# Supplementary material for: Transcriptome analysis of G protein-coupled receptors in distinct genetic subgroups of acute myeloid leukemia: identification of potential disease-specific targets
Source: PubMed Central journal article supplement (PMC5141352; doi:10.1038/bcj.2016.36), 2016-06-03

Suppl. Figure 1

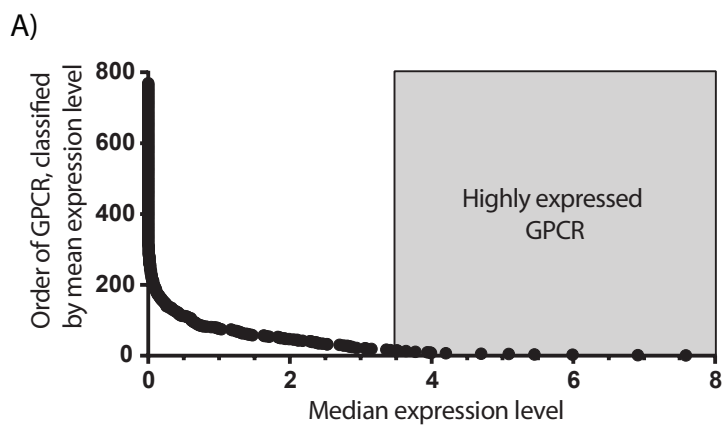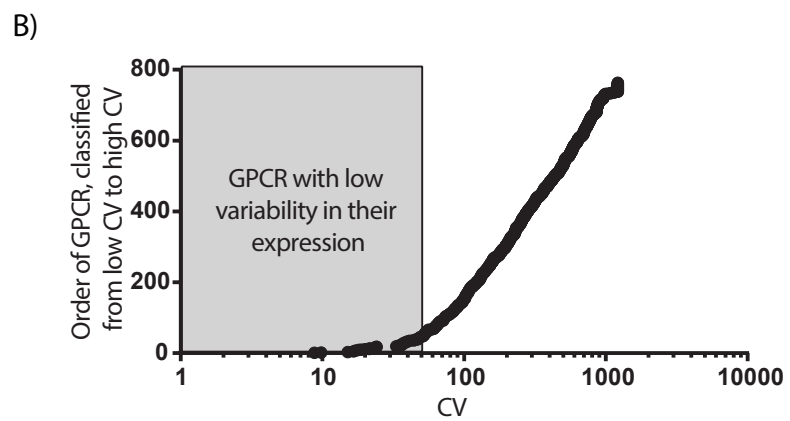



Suppl. Figure 3

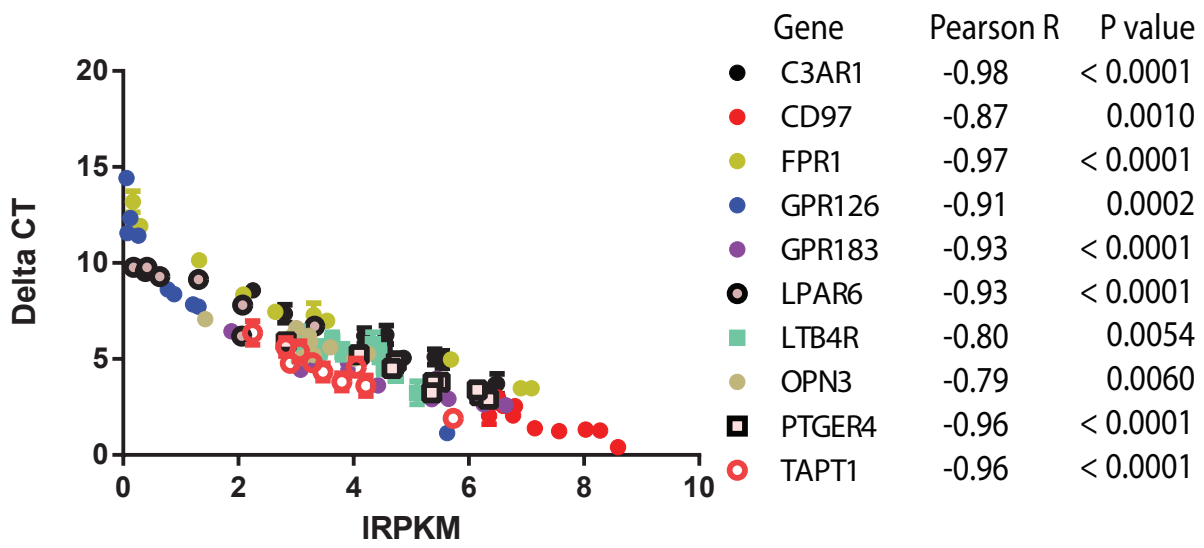

# Suppl. Figure 4

## CXCR4

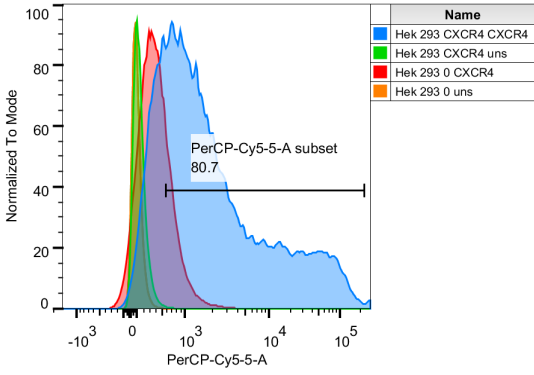

## CD97

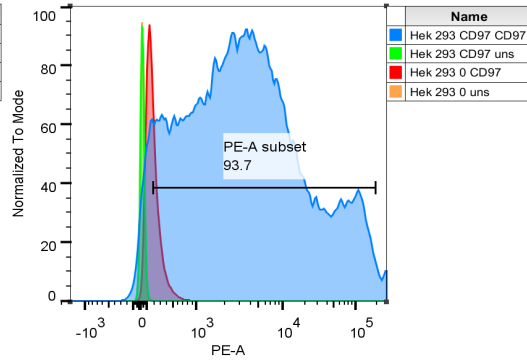

## LTB4R

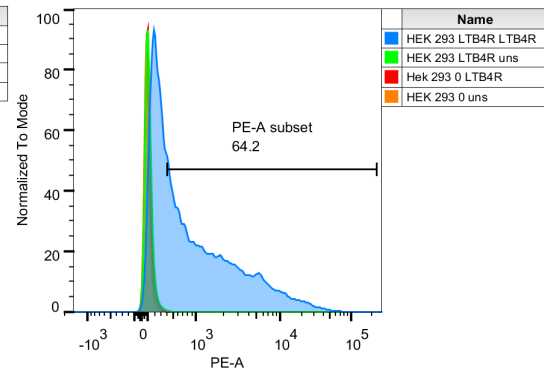

## FPR1

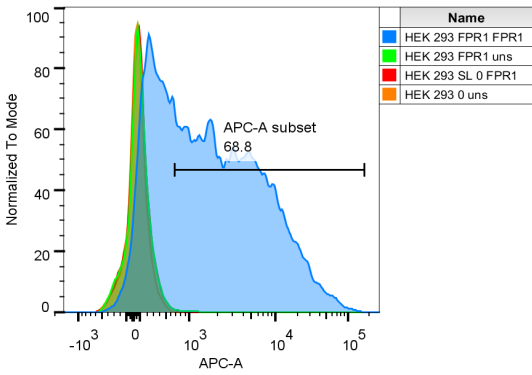

## C5AR1

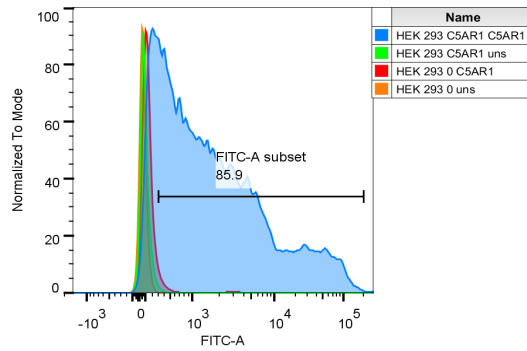

Suppl. Figure 5

A)

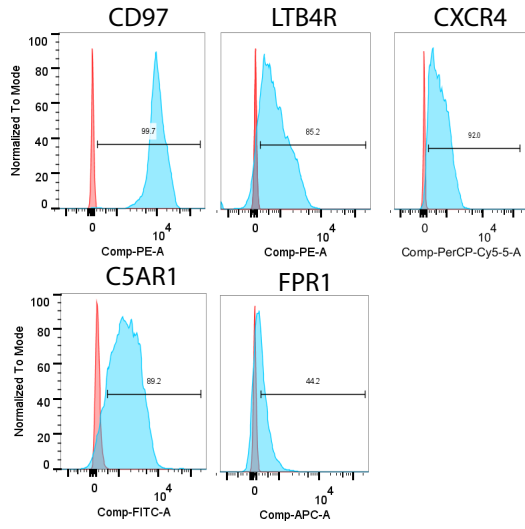

B)

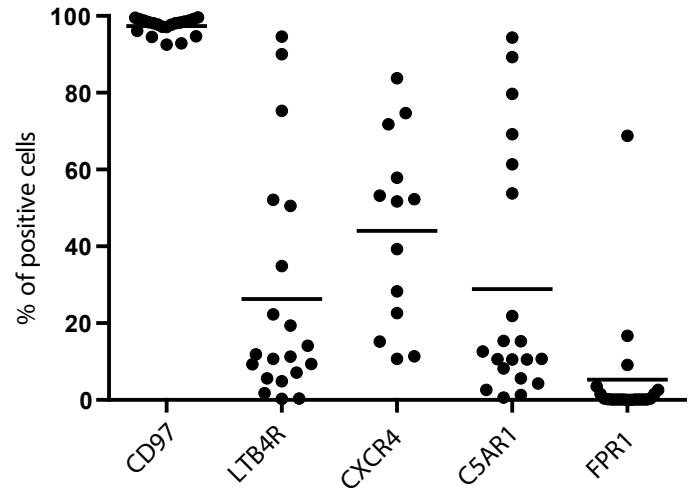

Suppl. Figure 6

A)

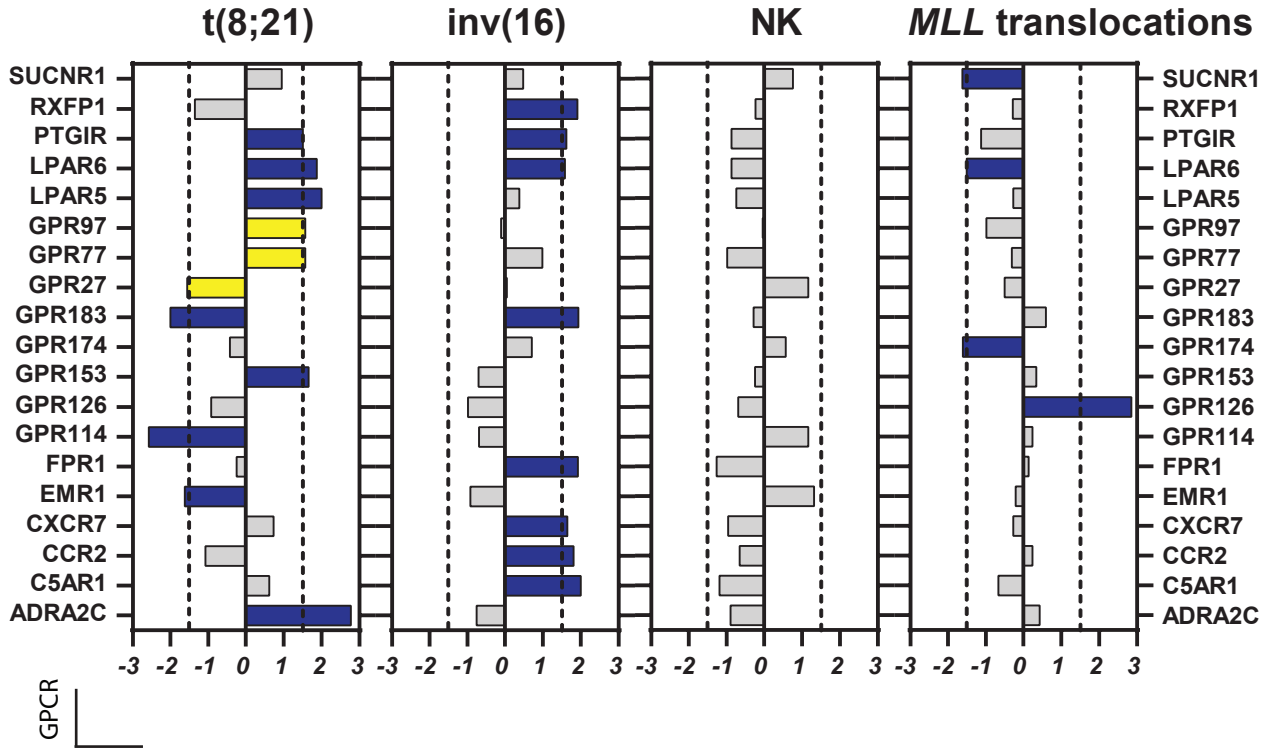

Difference of GPCR mean level of expression between AML with and without the cytogenetic abnormalities

B)

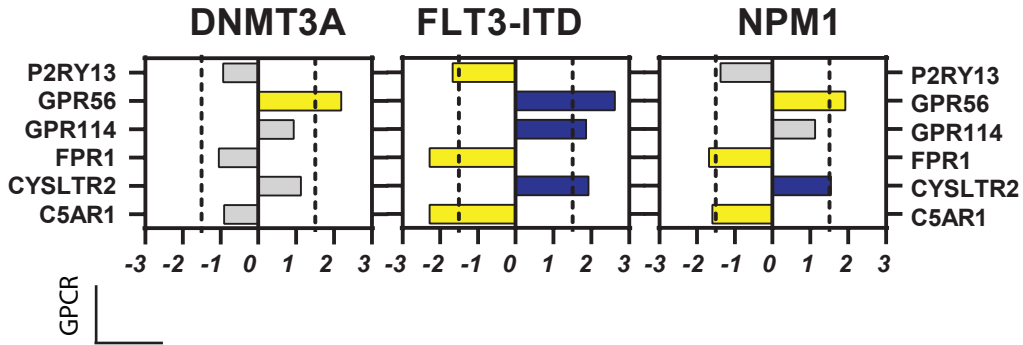

Difference of GPCR mean level of expression between AML with and without the gene mutation

Suppl. Figure 7

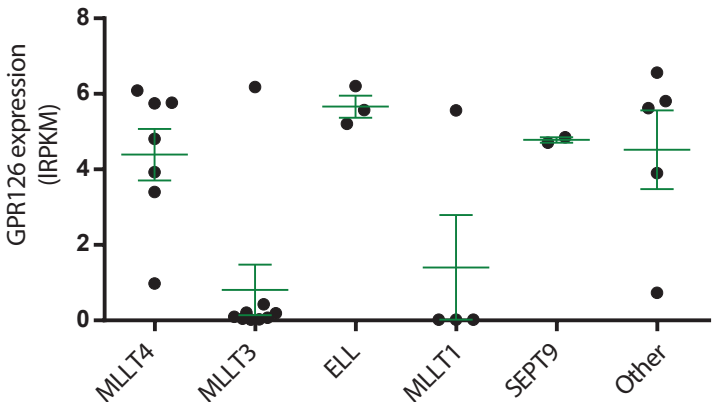

Supplement: bcj201636x2.pdf [file bcj201636x2.pdf]
